# Supplementary material
Source: Springer Nature journal article supplement (https://www.springermedizin.de/resource/supplementary/12348_2012_38_MOESM2_ESM.pdf/9673312)

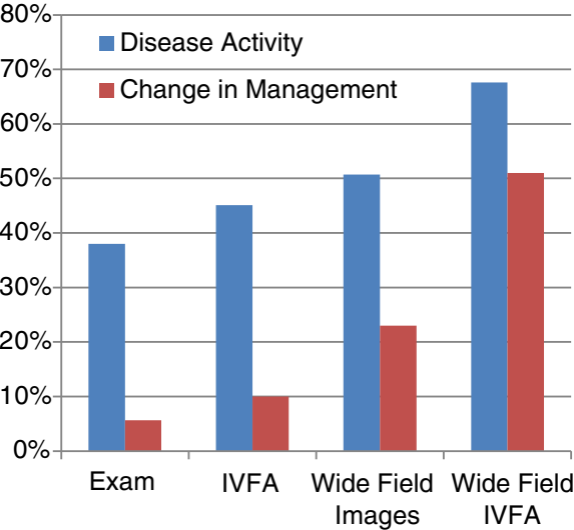

Supplement: MOESM2 [file 9673312]
